# Supplementary material for: Trident Nano-Indexing the Proteomics Table: Next-Version Clustering of Iron Carbide NPs and Protein Corona
Source: MDPI journal article supplement (doi:10.3390/molecules27185754), 2022-09-06
Supplement: s1 [file s1]

## Supporting information

### Trident Nano-Indexing the Proteomics Table: Next-Version Clustering of Iron Carbide NPs and Protein Corona

Murtaza Hasan <sup>1,2,\*</sup>, Ayesha Zafar <sup>2,3</sup>, Maryum Jabbar <sup>2</sup>, Tuba Tariq <sup>2</sup>, Yasmeen Manzoor <sup>2</sup>, Muhammad Mahmood Ahmed <sup>2</sup>, Shahbaz Gul Hassan <sup>4</sup>, Xugang Shu <sup>1,\*</sup> and Nasir Mahmood <sup>5,\*</sup>

<sup>1</sup> School of Chemistry and Chemical Engineering, Zhongkai University of Agriculture and Engineering, Guangzhou 510225, China

<sup>2</sup> Department of Biotechnology, The Islamia University of Bahawalpur, Bahawalpur 63100, Pakistan;

<sup>3</sup> Department of Biomedical Engineering, College of Future Technology, Peking University, Beijing 100871, China

<sup>4</sup> College of Information Science and Engineering, Zhongkai University of Agriculture and Engineering, Guangzhou 510225, China

<sup>5</sup> School of Science, RMIT University, Victoria 3000, Australia

## Corresponding Author

Dr Murtaza Hasan ([murtaza@zhku.edu.cn](mailto:murtaza@zhku.edu.cn))

Professor Xugang Shu ([xgshu@21cn.com](mailto:xgshu@21cn.com))

Dr Nasir Mahmood ([nasir.mahmood@rmit.edu.au](mailto:nasir.mahmood@rmit.edu.au))

## **Materials and Methods**

### **Materials**

Iron nitrate ( $\text{Fe}(\text{NO}_3)_3 \cdot 9\text{H}_2\text{O}$ ), glycine ( $\text{C}_2\text{H}_5\text{NO}_2$ ), and glucose ( $\text{C}_6\text{H}_{12}\text{O}_6 \cdot \text{H}_2\text{O}$ ) were purchased from Sigma-Aldrich. *Withania* plant extract as Bio-reducing agent and Distilled water and 99% ethanol were used. HeLa cell line was provided by Bahawal Victoria Hospital Bahawalpur.

### **Physical Characterization**

The Ultraviolet-visible (UV-vis) absorption spectra of green synthesized iron carbide NPs were recorded using a S22PC spectrophotometer (China) with wavelength range of 200–800 nm. For investigating about the presence of reducing biomolecules groups and interaction of green synthesized iron carbide with plant extract, the Fourier transform infrared (FTIR) spectra was performed using the instrument Spectrum100 model (Perkin Elmer, USA). To observe and detect the microscopic morphology, particle size distribution for iron carbide NPs and microscopic analysis was performed on a transmission electron microscope (TEM, Talos 200s, FEI, USA) equipped.

## Results

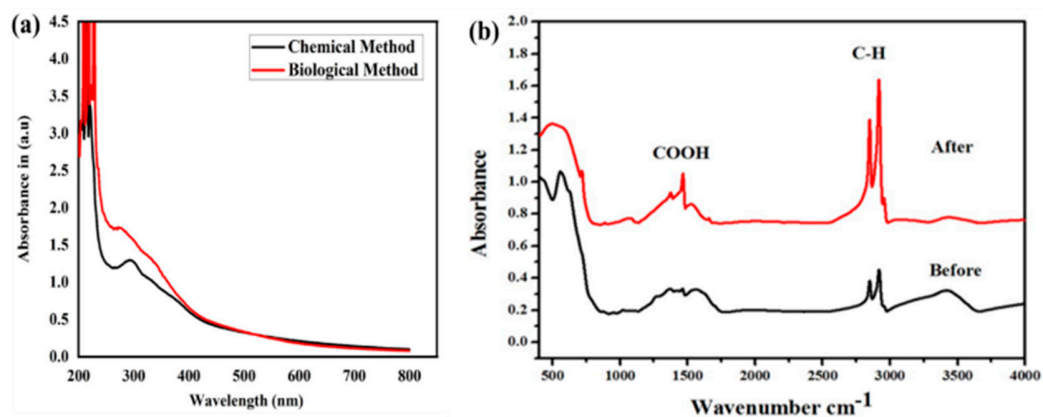

**Figure S1.** Ultraviolet-visible (UV-vis) and Fourier transform infrared (FTIR) spectra of coated and uncoated NPs.

**Table S1.** Total differential proteins of HeLa cells around  $\text{Fe}_2\text{C}$  NPs.

|    | Code   | Gene name | Protein name                       | Ratio | Mol. masses kDa | Location                                        | Molecular Function                      | Biological function                                        |
|----|--------|-----------|------------------------------------|-------|-----------------|-------------------------------------------------|-----------------------------------------|------------------------------------------------------------|
| 1. | P26447 | S100A4    | S100-A4                            | 1.71  | 11.729          | Extracellular region or secreted<br><br>Nucleus | RNA binding                             | positive regulation of I-kappaB kinase/NF-kappaB signaling |
| 2. | P01891 | HLA-A     | 1A68                               | 1.80  | 40.909          | ER<br><br>PM                                    | RNA binding                             | regulation of immune response                              |
| 3. | P18669 | PGAM1     | Phosphoglycerate mutase 1          | 2.00  | 28.804          | Cytosol<br><br>ER                               | phosphoglycerate mutase activity        | glycolytic process                                         |
| 4. | P32119 | PRDX2     | Peroxiredoxin-2                    | 2.00  | 21.892          | Cytoplasm<br><br>cytosol                        | antioxidant activity                    | cell redox homeostasis                                     |
| 5. | O43175 | PHGDH     | D-3-phosphoglycerate dehydrogenase | 2.00  | 56.651          | Cytosol<br><br>ER                               | phosphoglycerate dehydrogenase activity | Brain development                                          |
| 6. | P69905 | HBA1      | Hemoglobin subunit alpha           | 2.11  | 15.258          | Cytosol<br><br>ER                               | Heme binding                            | Oxygen transport                                           |

|     |        |          |                                           |      |         |                            |                                 |                                            |
|-----|--------|----------|-------------------------------------------|------|---------|----------------------------|---------------------------------|--------------------------------------------|
| 7.  | P60842 | EIF4A1   | Eukaryotic initiation factor 4A-I         | 2.50 | 46.154  | Cytosol<br>ER              | RNA binding                     | cytoplasmic translational initiation       |
| 8.  | Q07955 | SRSF1    | Serine/arginine-rich splicing factor 1    | 3.50 | 27.745  | Nucleus<br>Cytoplasm       | RNA binding                     | alternative mRNA splicing, via spliceosome |
| 9.  | Q13162 | PRDX4    | Peroxiredoxin-4                           | 0.29 | 30.540  | ER<br>cytoplasm            | thioredoxin peroxidase activity | cell redox homeostasis                     |
| 10. | P62424 | RPL7A    | 60S ribosomal protein L7a                 | 0.29 | 29.996  | Cytosol<br>Nucleus         | RNA binding                     | Translation                                |
| 11. | P23284 | PPIB     | Peptidyl-prolyl cis-trans isomerase B     | 0.29 | 23.743  | ER<br>Extracellular region | RNA binding                     | Bone development                           |
| 12. | Q07065 | CKAP4    | Cytoskeleton-associated protein 4         | 0.30 | 66.022  | Cytoskeleton<br>PM         | RNA binding                     | Post translation protein modification      |
| 13. | Q96AG4 | LRRC59   | Leucine-rich repeat-containing protein 59 | 0.33 | 34.930  | Nucleus<br>ER              | RNA binding                     | -                                          |
| 14. | P16401 | HIST1H1B | Histone H1.5                              | 0.36 | 22.580  | Nucleus<br>Chromosome      | RNA binding                     | Chromatin organization                     |
| 15. | Q8NB59 | TXNDC5   | Thioredoxin domain-containing protein 5   | 0.38 | 47.629  | ER<br>Extracellular region | isomerase activity              | apoptotic cell clearance                   |
| 16. | P04792 | HSPB1    | Heat shock protein beta-1                 | 0.39 | 22.783  | Cytoskeleton<br>Nucleus    | RNA binding                     | anterograde axonal protein transport       |
| 17. | Q14697 | GANAB    | Neutral alpha-glucosidase AB              | 0.40 | 106.874 | ER<br>Golgi apparatus      | RNA binding                     | N-glycan processing                        |
| 18. | P30101 | PDIA3    | Protein disulfide-isomerase A3            | 0.40 | 56.782  | ER<br>Endosome             | RNA binding                     | Protein folding                            |
| 19. | P36578 | RPL4     | 60S ribosomal protein L4                  | 0.40 | 47.697  | Cytosol<br>ER              | RNA binding                     | Translation                                |
| 20. | P35579 | MYH9     | Myosin-9                                  | 0.43 | 226.532 | Cytoskeleton               | RNA binding                     | actin cytoskeleton reorganization          |

|     |        |       |                                                       |      |         |                                 |                                           |                                                      |
|-----|--------|-------|-------------------------------------------------------|------|---------|---------------------------------|-------------------------------------------|------------------------------------------------------|
|     |        |       |                                                       |      |         | cytosol                         |                                           |                                                      |
| 21. | Q15084 | PDIA6 | Protein disulfide-isomerase A6                        | 0.45 | 48.121  | ER<br>PM                        | peptide disulfide oxidoreductase activity | Protein folding                                      |
| 22. | P00966 | ASS1  | Argininosuccinate synthase                            | 0.46 | 46.530  | Cytosol<br>ER                   | RNA binding                               | arginine biosynthetic process                        |
| 23. | P31327 | CPS1  | Carbamoyl-phosphate synthase [ammonia], mitochondrial | 0.49 | 164.939 | Mitochondria<br>Nucleus         | ATP binding                               | carbamoyl phosphate biosynthetic process             |
| 24. | O43852 | CALU  | Calumenin                                             | 0.50 | 37.107  | ER<br>Golgi apparatus           | calcium ion binding                       | cellular protein metabolic process                   |
| 25. | P10606 | COX5B | Cytochrome c oxidase subunit 5B, mitochondrial        | 0.50 | 13.696  | Mitochondria                    | cytochrome-c oxidase activity             | mitochondrial ATP synthesis coupled proton transport |
| 26. | P05556 | ITGB1 | Integrin beta-1                                       | 0.50 | 88.415  | Endosome<br>PM                  | Actin binding                             | B cell differentiation                               |
| 27. | P20700 | LMNB1 | Lamin-B1                                              | 0.50 | 66.408  | Nucleus<br>Cytoskeleton         | structural molecule activity              | interleukin-12-mediated signaling pathway            |
| 28. | P32322 | PYCR1 | Pyrroline-5-carboxylate reductase 1, mitochondrial    | 0.50 | 33.361  | Mitochondria                    | identical protein binding                 | L-proline biosynthetic process                       |
| 29. | O75340 | PDCD6 | Programmed cell death protein 6                       | 0.50 | 21.868  | Nucleus<br>endosome             | Calcium ion binding                       | COPII vesicle coating                                |
| 30. | Q15149 | PLEC  | Plectin                                               | 0.50 | 531.791 | Cytoskeleton<br>Cytosol         | RNA binding                               | hemidesmosome assembly                               |
| 31. | P39023 | RPL3  | 60S ribosomal protein L3                              | 0.50 | 46.109  | Nucleus<br>Cytosol              | RNA binding                               | Translation                                          |
| 32. | P62851 | RPS25 | 40S ribosomal protein S25                             | 0.50 | 13.742  | Cytosol<br>Extracellular region | RNA binding                               | Translation                                          |

|     |        |          |                                        |      |        |                                 |                                          |                                    |
|-----|--------|----------|----------------------------------------|------|--------|---------------------------------|------------------------------------------|------------------------------------|
| 33. | P61247 | RPS3A    | 40S ribosomal protein S3a              | 0.50 | 29.945 | Nucleus<br>ER                   | RNA binding                              | Translation                        |
| 34. | P08670 | VIM      | Vimentin                               | 0.53 | 53.652 | Cytoskeleton<br>Nucleus         | double-stranded RNA binding              | positive regulation of translation |
| 35. | P61006 | RAB8A    | Ras-related protein Rab-8A             | 0.56 | 23.668 | Cytoskeleton<br>Endosome        | GTP binding                              | Rab protein signal transduction    |
| 36. | P18124 | RPL7     | 60S ribosomal protein L7               | 0.56 | 29.226 | Cytosol<br>nucleus              | DNA binding RNA binding                  | Translation                        |
| 37. | P62280 | RPS11    | 40S ribosomal protein S11              | 0.57 | 18.431 | Cytosol<br>Extracellular region | RNA binding                              | Translation                        |
| 38. | P11142 | HSPA8    | Heat shock cognate 71 kDa protein      | 0.58 | 70.898 | Plasma membrane<br>Nucleus      | ATP binding                              | ATP metabolic process              |
| 39. | P15311 | EZR      | Ezrin                                  | 0.60 | 69.413 | Cytoskeleton<br>PM              | ATPase binding                           | actin cytoskeleton reorganization  |
| 40. | Q99714 | HSD17B10 | 3-hydroxyacyl-CoA dehydrogenase type-2 | 0.60 | 26.923 | Mitochondria<br>PM              | 3-hydroxyacyl-CoA dehydrogenase activity | lipid metabolic process            |
| 41. | P55209 | NAP1L1   | Nucleosome assembly protein 1-like 1   | 0.60 | 45.374 | Nucleus<br>Cytoplasm            | RNA binding                              | DNA replication                    |
| 42. | P08238 | HSP90AB1 | Heat shock protein HSP 90-beta         | 0.62 | 83.264 | PM<br>Extracellular region      | ATP binding                              | Protein folding                    |
| 43. | P80723 | BASP1    | Brain acid soluble protein 1           | 0.63 | 22.693 | PM<br>Extracellular region      | protein domain specific binding          | diaphragm development              |
| 44. | P02545 | LMNA     | Prelamin-A/C                           | 0.63 | 74.139 | Nucleus<br>cytoskeleton         | identical protein binding                | cellular protein localization      |
| 45. | P07237 | P4HB     | Protein disulfide-isomerase            | 0.63 | 57.116 | PM<br>ER                        | RNA binding                              | Protein folding                    |

|     |        |        |                                                                          |      |        |                                             |                                      |                                        |
|-----|--------|--------|--------------------------------------------------------------------------|------|--------|---------------------------------------------|--------------------------------------|----------------------------------------|
|     |        |        |                                                                          |      |        |                                             |                                      |                                        |
| 46. | P09923 | ALPI   | Intestinal-type alkaline phosphatase                                     | 0.63 | 56.812 | PM<br>Extracellular region                  | alkaline phosphatase activity        | Dephosphorylation                      |
| 47. | P05186 | ALPL   | Alkaline phosphatase, tissue-nonspecific isozyme                         | 0.63 | 57.305 | PM<br>Extracellular region                  | alkaline phosphatase activity        | skeletal system development            |
| 48. | P38646 | HSPA9  | Stress-70 protein, mitochondrial                                         | 0.65 | 73.680 | Mitochondria<br>Nucleus                     | ATP binding                          | cellular response to heat              |
| 49. | P14618 | PKM    | Pyruvate kinase PKM                                                      | 0.65 | 57.937 | Mitochondria<br>nucleus                     | ATP binding                          | ATP biosynthetic process               |
| 50. | P0DMV8 | HSPA1A | Heat shock 70 kDa protein 1A                                             | 0.65 | 70.052 | Cytoskeleton<br>Nucleus                     | ATP binding                          | ATP metabolic process                  |
| 51. | P40926 | MDH2   | Malate dehydrogenase, mitochondrial                                      | 0.65 | 35.503 | Mitochondria<br>Extracellular region        | L-malate dehydrogenase activity      | aerobic respiration                    |
| 52. | P07355 | ANXA2  | Annexin A2                                                               | 0.65 | 38.604 | Extracellular region or secreted<br>Cytosol | RNA binding                          | Angiogenesis                           |
| 53. | P49411 | TUFM   | Elongation factor Tu, mitochondrial                                      | 0.67 | 49.542 | Mitochondria<br>Extracellular region        | GTP binding                          | mitochondrial translational elongation |
| 54. | P35268 | RPL22  | 60S ribosomal protein L22                                                | 0.67 | 14.787 | Cytosol<br>Extracellular region             | RNA binding                          | Translation                            |
| 55. | P04843 | RPN1   | Dolichyl-diphosphooligosaccharide--protein glycosyltransferase subunit 1 | 0.67 | 68.569 | ER<br>Cytosol                               | RNA binding                          | cellular protein modification process  |
| 56. | P45880 | VDAC2  | Voltage-dependent anion-selective                                        | 0.67 | 31.567 | Mitochondria                                | voltage-gated anion channel activity | anion transport                        |

|     |        |          |                                                     |      |         |                                 |                                 |                                                                       |
|-----|--------|----------|-----------------------------------------------------|------|---------|---------------------------------|---------------------------------|-----------------------------------------------------------------------|
|     |        |          | channel protein 2                                   |      |         |                                 |                                 |                                                                       |
| 57. | P08133 | ANAX6    | Annexin A6                                          | 1.75 | 75.873  | Cytoplasm<br>Endosome           | GTP binding                     | apoptotic signaling pathway                                           |
| 58. | P00533 | EGFR     | Epidermal growth factor receptor                    | 2.33 | 134.277 | E.R<br>PM                       | ATP binding                     | activation of phospholipase A2 activity by calcium-mediated signaling |
| 59. | P16403 | HIST1H1C | Histone H1.2                                        | 1.71 | 21.365  | Nucleus<br>Chromosome           | RNA binding                     | chromosome condensation                                               |
| 60. | P60842 | EIF4A1   | Eukaryotic initiation factor 4A-I                   | 2.50 | 46.154  | Cytosol<br>Extracellular region | RNA binding                     | cytoplasmic translational initiation                                  |
| 61. | P13667 | PDIA4    | Protein disulfide-isomerase A4                      | 2.00 | 72.932  | ER<br>Extracellular region      | RNA binding                     | Protein folding                                                       |
| 62. | P00558 | PGK1     | Phosphoglycerate kinase 1                           | 3.00 | 44.615  | Cytoplasm<br>Cytosol            | ADP binding                     | cellular response to hypoxia                                          |
| 63. | P62249 | RPS16    | 40S ribosomal protein S16                           | 1.67 | 16.445  | Cytosol<br>Extracellular region | RNA binding                     | Translation                                                           |
| 64. | Q07955 | SRSF1    | Serine/arginine-rich splicing factor 1              | 2.50 | 27.745  | Nucleus<br>Cytoplasm            | DNA topoisomerase binding       | alternative mRNA splicing, via spliceosome                            |
| 65. | P27105 | STOM     | Erythrocyte band 7 integral membrane protein        | 2.00 | 31.731  | Cytoskeleton<br>PM              | RNA polymerase binding          | protein homooligomerization                                           |
| 66. | Q09666 | AHNAK    | Neuroblast differentiation-associated protein AHNAK | 0.37 | 629.101 | Nucleus<br>Cytoskeleton         | RNA binding                     | protein complex oligomerization                                       |
| 67. | P80723 | BASP1    | Brain acid soluble protein 1                        | 0.63 | 22.693  | PM<br>Cytoskeleton              | protein domain specific binding | negative regulation of transcription, DNA-templated                   |
| 68. | O43852 | CALU     | Calumenin                                           | 0.50 | 37.107  | ER<br>Golgi apparatus           | calcium ion binding             | cellular protein metabolic process                                    |



|     |        |           |                                             |      |         |                                      |                                           |                                       |
|-----|--------|-----------|---------------------------------------------|------|---------|--------------------------------------|-------------------------------------------|---------------------------------------|
| 69. | P61604 | HSPE1     | 10 kDa heat shock protein, mitochondria     | 0.64 | 10.932  | Mitochondria<br>Extracellular region | ATP binding                               | Protein folding                       |
| 70. | P58107 | EPPK1     | Epiplakin                                   | 0.50 | 555.658 | Cytoskeleton<br>PM                   | RNA binding                               | intermediate filament bundle assembly |
| 71. | P38646 | HSPA9     | Stress-70 protein, mitochondrial            | 0.65 | 73.680  | Nucleus<br>Mitochondria              | ATP binding                               | Protein folding                       |
| 72. | P16401 | HIST1H1B  | Histone H1.5                                | 0.64 | 22.580  | Nucleus                              | RNA binding                               | chromatin organization                |
| 73. | P33778 | HIST1H2BB | Histone H2B type 1-B                        | 0.51 | 13.950  | Nucleus<br>Cytosol                   | DNA binding                               | nucleosome assembly                   |
| 74. | P62807 | HIST1H2BC | Histone H2B type 1-C/E/F/G/I                | 0.53 | 13.906  | Nucleus<br>Cytosol                   | DNA binding                               | antibacterial humoral response        |
| 75. | Q99714 | HSD17B10  | 3-hydroxyacyl-CoA dehydrogenase type-2      | 0.60 | 26.923  | Mitochondria<br>PM                   | RNA binding                               | mitochondrial tRNA 3'-end processing  |
| 76. | P11279 | LAMP1     | Lysosome-associated membrane glycoprotein 1 | 0.40 | 44.882  | Cytosol<br>Endosome                  | enzyme binding                            | Golgi to lysosome transport           |
| 77. | P55209 | NAP1L1    | Nucleosome assembly protein 1-like 1        | 0.40 | 45.374  | Nucleus<br>Cytoplasm                 | RNA binding                               | DNA binding                           |
| 78. | O75340 | PDCD6     | Programmed cell death protein 6             | 0.38 | 21.868  | ER<br>Nucleus                        | calcium ion binding                       | COPII vesicle coating                 |
| 79. | Q15084 | PDIA6     | Protein disulfide-isomerase A6              | 0.55 | 48.121  | ER<br>PM                             | peptide disulfide oxidoreductase activity | Protein folding                       |
| 80. | Q99623 | PHB2      | Prohibitin-2                                | 0.62 | 33.296  | Nucleus                              | amide binding                             | mitochondrion organization            |

|     |        |        |                                                                          |      |        |                                         |                                           |                                    |
|-----|--------|--------|--------------------------------------------------------------------------|------|--------|-----------------------------------------|-------------------------------------------|------------------------------------|
|     |        |        |                                                                          |      |        | Mitochondr<br>ia                        |                                           |                                    |
| 81. | P09923 | ALP1   | Intestinal-<br>type alkaline<br>phosphatase                              | 0.63 | 56.812 | PM<br><br>Extracellula<br>r region      | alkaline<br>phosphatase<br>activity       | Dephosphorylation                  |
| 82. | P30048 | PRDX3  | Thioredoxin-<br>dependent<br>peroxide<br>reductase,<br>mitochondri<br>al | 0.50 | 27.693 | Endosome<br><br>Mitochondr<br>ia        | alkyl hydroperoxide<br>reductase activity | cell redox<br>homeostasis          |
| 83. | P07737 | PFN1   | Profilin-1                                                               | 0.56 | 15.054 | Cytoskeleto<br>n<br><br>cytosol         | RNA binding                               | protein stabilization              |
| 84. | P61026 | RAB10  | Ras-related<br>protein Rab-<br>10                                        | 0.58 | 22.541 | Cytoskeleto<br>n<br><br>ER              | GDP binding                               | Rab protein signal<br>transduction |
| 85. | P51149 | RAB7A  | Ras-related<br>protein Rab-<br>7a                                        | 0.60 | 23.490 | Endosome<br><br>Cytosol                 | GDP binding                               | Rab protein signal<br>transduction |
| 86. | P26373 | RPL13  | 60S<br>ribosomal<br>protein L13                                          | 0.63 | 24.261 | Cytosol<br><br>ER                       | RNA binding                               | Translation                        |
| 87. | P46778 | RPL21  | 60S<br>ribosomal<br>protein L21                                          | 0.60 | 18.565 | ER<br><br>Cytosol                       | RNA binding                               | Translation                        |
| 88. | P83731 | RPL24  | 60S<br>ribosomal<br>protein L24                                          | 0.67 | 17.779 | Cytosol<br><br>ER                       | RNA binding                               | Translation                        |
| 89. | P36578 | RPL4   | 60S<br>ribosomal<br>protein L4                                           | 0.40 | 47.697 | Cytosol<br><br>ER                       | RNA binding                               | Translation                        |
| 90. | P18124 | RPL7   | 60S<br>ribosomal<br>protein L7                                           | 0.44 | 29.226 | Cytosol<br><br>nucleus                  | DNA binding                               | Translation                        |
| 91. | P62424 | RPL7A  | 60S<br>ribosomal<br>protein L7a                                          | 0.50 | 29.996 | Cytosol<br><br>nucleus                  | RNA binding                               | Translation                        |
| 92. | P52815 | MRPL12 | 39S<br>ribosomal<br>protein L12,<br>mitochondri<br>al                    | 0.67 | 21.348 | Mitochondr<br>ia                        | RNA binding                               | mitochondrial<br>transcription     |
| 93. | P62280 | RPS11  | 40S<br>ribosomal<br>protein S11                                          | 0.57 | 18.431 | Cytosol<br><br>Extracellula<br>r region | RNA binding                               | Translation                        |

|      |        |          |                                                |      |         |                                 |                                           |                                                      |
|------|--------|----------|------------------------------------------------|------|---------|---------------------------------|-------------------------------------------|------------------------------------------------------|
| 94.  | P62244 | RPS15A   | 40S ribosomal protein S15a                     | 0.67 | 14.840  | Cytosol<br>Extracellular region | RNA binding                               | Translation                                          |
| 95.  | P51571 | SSR4     | Translocon-associated protein subunit delta    | 0.50 | 18.999  | ER<br>Extracellular region      | Calcium binding                           | -                                                    |
| 96.  | P02786 | TFRC     | Transferrin receptor protein 1                 | 0.62 | 84.871  | PM<br>endosome                  | RNA binding                               | cellular iron ion homeostasis                        |
| 97.  | Q8NBS9 | TXNDC5   | Thioredoxin domain-containing protein 5        | 0.63 | 47.629  | ER<br>Extracellular region      | isomerase activity                        | apoptotic cell clearance                             |
| 98.  | O95573 | ACSL3    | Long-chain-fatty-acid--CoA ligase 3            | 2.00 | 80.420  | Mitochondria<br>ER              | long-chain fatty acid-CoA ligase activity | long-chain fatty acid import into cell               |
| 99.  | P00966 | ASS1     | Argininosuccinate synthase                     | 2.50 | 46.530  | Cytosol<br>ER                   | ATP binding                               | arginine biosynthetic process                        |
| 100. | Q07065 | CKAP4    | Cytoskeleton-associated protein 4              | 2.67 | 66.022  | Cytoskeleton<br>PM              | RNA binding                               | post-translational protein modification              |
| 101. | P10606 | COX5B    | Cytochrome c oxidase subunit 5B, mitochondrial | 2.00 | 13.696  | Mitochondria                    | cytochrome-c oxidase activity             | mitochondrial ATP synthesis coupled proton transport |
| 102. | Q14697 | GANAB    | Neutral alpha-glucosidase AB                   | 2.00 | 106.874 | ER<br>Extracellular region      | RNA binding                               | N-glycan processing                                  |
| 103. | P16403 | HIST1H1C | Histone H1.2                                   | 2.40 | 21.365  | Nucleus<br>Chromosome           | RNA binding                               | chromosome condensation                              |
| 104. | P16401 | HIST1H1B | Histone H1.5                                   | 1.75 | 22.580  | Nucleus<br>Chromosome           | RNA binding                               | chromatin organization                               |
| 105. | P04792 | HSPB1    | Heat shock protein beta-1                      | 1.86 | 22.783  | Cytoskeleton<br>Nucleus         | RNA binding                               | anterograde axonal protein transport                 |
| 106. | P02545 | LMNA     | Prelamin-A/C                                   | 1.80 | 74.139  | Nucleus                         | identical protein binding                 | cellular protein localization                        |

|      |        |        |                                                                          |      |         |                            |                                 |                                        |
|------|--------|--------|--------------------------------------------------------------------------|------|---------|----------------------------|---------------------------------|----------------------------------------|
|      |        |        |                                                                          |      |         | Cytoskeleton               |                                 |                                        |
| 107. | Q96AG4 | LRRC59 | Leucine-rich repeat-containing protein 59                                | 2.33 | 34.930  | Nucleus<br>ER              | RNA binding                     | -                                      |
| 108. | P35579 | MYH9   | Myosin-9                                                                 | 2.00 | 226.532 | Cytoskeleton<br>Cytosol    | ADP binding                     | actin cytoskeleton reorganization      |
| 109. | P30101 | PDIA3  | Protein disulfide-isomerase A3                                           | 2.67 | 56.782  | ER<br>Endosome             | RNA binding                     | Protein folding                        |
| 110. | P13667 | PDIA4  | Protein disulfide-isomerase A4                                           | 2.67 | 72.932  | ER<br>Extracellular region | RNA binding                     | Protein folding                        |
| 111. | Q15149 | PLEC   | Plectin                                                                  | 1.75 | 531.791 | Cytoskeleton<br>Cytosol    | RNA binding                     | hemidesmosome assembly                 |
| 112. | P23284 | PPIB   | Peptidyl-prolyl cis-trans isomerase B                                    | 2.40 | 23.743  | ER<br>Extracellular region | RNA binding                     | bone development                       |
| 113. | Q13162 | PRDX4  | Peroxiredoxin-4                                                          | 2.50 | 30.540  | ER<br>cytosol              | thioredoxin peroxidase activity | cell redox homeostasis                 |
| 114. | P62424 | RPL7A  | 60S ribosomal protein L7a                                                | 1.75 | 29.996  | Cytosol<br>nucleus         | RNA binding                     | Translation                            |
| 115. | P04844 | RPN2   | Dolichyl-diphosphooligosaccharide--protein glycosyltransferase subunit 2 | 2.00 | 69.284  | ER                         | Ribosome binding                | cellular protein modification process  |
| 116. | P61247 | RPS3A  | 40S ribosomal protein S3a                                                | 2.33 | 29.945  | Nucleus<br>cytosol         | RNA binding                     | Translation                            |
| 117. | Q8NB59 | TXNDC5 | Thioredoxin domain-containing protein 5                                  | 1.67 | 47.692  | ER<br>Extracellular region | isomerase activity              | apoptotic cell clearance               |
| 118. | P08670 | VIM    | Vimentin                                                                 | 1.95 | 53.652  | Cytoskeleton<br>Nucleus    | double-stranded RNA binding     | positive regulation of translation     |
| 119. | P01891 | HLA-A  | HLA class I histocompati                                                 | 0.56 | 40.909  | ER                         | RNA binding                     | antigen processing and presentation of |

|      |        |            |                                                   |      |         |                            |                                          |                                                                            |
|------|--------|------------|---------------------------------------------------|------|---------|----------------------------|------------------------------------------|----------------------------------------------------------------------------|
|      |        |            | bility antigen, A-68 alpha chain                  |      |         | endosome                   |                                          | endogenous peptide antigen via MHC class I via ER pathway, TAP-independent |
| 120. | P68032 | ACTC1      | Actin, alpha cardiac muscle 1                     | 0.61 | 42.019  | Cytoskeleton<br>Cytosol    | ATP binding                              | actin filament organization                                                |
| 121. | P48047 | ATP5PO     | ATP synthase subunit O, mitochondrial             | 0.67 | 23.277  | Mitochondria<br>Nucleus    | ATPase binding                           | ATP5PO                                                                     |
| 122. | P27824 | CANX       | Calnexin                                          | 0.53 | 67.568  | ER<br>Extracellular region | RNA binding                              | Protein folding                                                            |
| 123. | P13987 | CD59       | CD59 glycoprotein                                 | 0.67 | 14.177  | PM<br>Extracellular region | complement binding                       | cell surface receptor signaling pathway                                    |
| 124. | P40939 | HADHA      | Trifunctional enzyme subunit alpha, mitochondrial | 0.67 | 83.000  | Mitochondria               | 3-hydroxyacyl-CoA dehydrogenase activity | fatty acid beta-oxidation                                                  |
| 125. | P58107 | EPPK1      | Epiplakin                                         | 0.40 | 555.658 | Cytoskeleton<br>PM         | RNA binding                              | intermediate filament bundle assembly                                      |
| 126. | P84090 | ERH        | Enhancer of rudimentary homolog                   | 0.50 | 12.259  | Methylosome                | RNA binding                              | Cell cycle                                                                 |
| 127. | P20671 | HIST1H2AD  | Histone H2A type 1-D                              | 0.63 | 14.107  | Nucleus<br>ER              | DNA binding                              | chromatin organization                                                     |
| 128. | Q6FI13 | HIST2H2AA3 | Histone H2A type 2-A                              | 0.63 | 14.095  | Nucleus<br>ER              | DNA binding                              | chromatin organization                                                     |
| 129. | O75367 | H2AFY      | Core histone macro-H2A.1                          | 0.60 | 39.617  | Nucleus<br>ER              | DNA binding                              | chromatin organization                                                     |
| 130. | P33778 | HIST1H2BB  | Histone H2B type 1-B                              | 0.48 | 13.950  | Nucleus<br>cytosol         | DNA binding                              | nucleosome assembly                                                        |
| 131. | P62807 | HIST1H2BC  | Histone H2B type 1-C/E/F/G/I                      | 0.54 | 13.906  | Nucleus<br>cytosol         | DNA binding                              | nucleosome assembly                                                        |

|      |        |        |                                           |      |         |                                 |                                  |                        |
|------|--------|--------|-------------------------------------------|------|---------|---------------------------------|----------------------------------|------------------------|
| 132. | P69905 | HBA1   | Hemoglobin subunit alpha                  | 0.53 | 15.258  | Cytosol<br>Extracellular region | heme binding                     | Oxygen transport       |
| 133. | P46940 | IQGAP1 | Ras GTPase-activating-like protein IQGAP1 | 0.67 | 189.252 | Nucleus<br>Cytoskeleton         | GTPase activator activity        | Signal transduction    |
| 134. | P55209 | NAP1L1 | Nucleosome assembly protein 1-like 1      | 0.67 | 45.374  | Nucleus<br>Cytoplasm            | RNA binding                      | DNA replication        |
| 135. | Q15366 | PCBP2  | Poly(rC)-binding protein 2                | 0.67 | 38.580  | Nucleus<br>Extracellular region | RNA binding                      | mRNA metabolic process |
| 136. | Q99623 | PHB2   | Prohibitin-2                              | 0.67 | 33.296  | Nucleus<br>Mitochondria         | Amide binding                    | Protein stabilization  |
| 137. | P32119 | PRDX2  | Peroxiredoxin-2                           | 0.67 | 21.892  | Cytosol<br>Extracellular region | antioxidant activity             | cell redox homeostasis |
| 138. | P07737 | PFN1   | Profilin-1                                | 0.50 | 15.045  | Cytoskeleton<br>Cytosol         | RNA binding                      | protein stabilization  |
| 139. | P20742 | PZP    | Pregnancy zone protein                    | 0.57 | 163.863 | Extracellular region            | endopeptidase inhibitor activity | female pregnancy       |
| 140. | P26373 | RPL13  | 60S ribosomal protein L13                 | 0.63 | 24.261  | Cytosol<br>ER                   | RNA binding                      | Translation            |
| 141. | P83731 | RPL24  | 60S ribosomal protein L24                 | 0.57 | 17.779  | Cytosol<br>ER                   | RNA binding                      | Translation            |
| 142. | Q13501 | SQSTM1 | Sequestosome-1                            | 0.50 | 47.687  | Cytosol<br>Nucleus              | SH2 domain binding               | Aggrephagy             |

**Table S2.** Tame type proteins (CW).

| Sr. No | Code   | Gene name | Protein name                           | Ratio | Mol. masses kDa | Location                                        | Molecular Function                      | Biological function                                        |
|--------|--------|-----------|----------------------------------------|-------|-----------------|-------------------------------------------------|-----------------------------------------|------------------------------------------------------------|
| 1.     | P26447 | S100A4    | S100-A4                                | 1.71  | 11.729          | Extracellular region or secreted<br><br>Nucleus | RNA binding                             | positive regulation of I-kappaB kinase/NF-kappaB signaling |
| 2.     | P01891 | HLA-A     | 1A68                                   | 1.80  | 40.909          | ER<br><br>PM                                    | RNA binding                             | regulation of immune response                              |
| 3.     | P18669 | PGAM1     | Phosphoglycerate mutase 1              | 2.00  | 28.804          | Cytosol<br><br>ER                               | phosphoglycerate mutase activity        | glycolytic process                                         |
| 4.     | P32119 | PRDX2     | Peroxiredoxin-2                        | 2.00  | 21.892          | Cytoplasm<br><br>cytosol                        | antioxidant activity                    | cell redox homeostasis                                     |
| 5.     | O43175 | PHGDH     | D-3-phosphoglycerate dehydrogenase     | 2.00  | 56.651          | Cytosol<br><br>ER                               | phosphoglycerate dehydrogenase activity | Brain development                                          |
| 6.     | P69905 | HBA1      | Hemoglobin subunit alpha               | 2.11  | 15.258          | Cytosol<br><br>ER                               | Heme binding                            | Oxygen transport                                           |
| 7.     | P60842 | EIF4A1    | Eukaryotic initiation factor 4A-I      | 2.50  | 46.154          | Cytosol<br><br>ER                               | RNA binding                             | cytoplasmic translational initiation                       |
| 8.     | Q07955 | SRSF1     | Serine/arginine-rich splicing factor 1 | 3.50  | 27.745          | Nucleus<br><br>Cytoplasm                        | RNA binding                             | alternative mRNA splicing, via spliceosome                 |
| 9.     | Q13162 | PRDX4     | Peroxiredoxin-4                        | 0.29  | 30.540          | ER<br><br>cytoplasm                             | thioredoxin peroxidase activity         | cell redox homeostasis                                     |
| 10.    | P62424 | RPL7A     | 60S ribosomal protein L7a              | 0.29  | 29.996          | Cytosol<br><br>Nucleus                          | RNA binding                             | Translation                                                |
| 11.    | P23284 | PPIB      | Peptidyl-prolyl cis-trans isomerase B  | 0.29  | 23.743          | ER<br><br>Extracellular region                  | RNA binding                             | Bone development                                           |
| 12.    | Q07065 | CKAP4     | Cytoskeleton-associated protein 4      | 0.30  | 66.022          | Cytoskeleton                                    | RNA binding                             | Post translation protein modification                      |

|     |        |          |                                                       |      |         |                            |                                           |                                          |
|-----|--------|----------|-------------------------------------------------------|------|---------|----------------------------|-------------------------------------------|------------------------------------------|
|     |        |          |                                                       |      |         | PM                         |                                           |                                          |
| 13. | Q96AG4 | LRRC59   | Leucine-rich repeat-containing protein 59             | 0.33 | 34.930  | Nucleus<br>ER              | RNA binding                               | -                                        |
| 14. | P16401 | HIST1H1B | Histone H1.5                                          | 0.36 | 22.580  | Nucleus<br>Chromosome      | RNA binding                               | Chromatin organization                   |
| 15. | Q8NBS9 | TXNDC5   | Thioredoxin domain-containing protein 5               | 0.38 | 47.629  | ER<br>Extracellular region | isomerase activity                        | apoptotic cell clearance                 |
| 16. | P04792 | HSPB1    | Heat shock protein beta-1                             | 0.39 | 22.783  | Cytoskeleton<br>Nucleus    | RNA binding                               | anterograde axonal protein transport     |
| 17. | Q14697 | GANAB    | Neutral alpha-glucosidase AB                          | 0.40 | 106.874 | ER<br>Golgi apparatus      | RNA binding                               | N-glycan processing                      |
| 18. | P30101 | PDIA3    | Protein disulfide-isomerase A3                        | 0.40 | 56.782  | ER<br>Endosome             | RNA binding                               | Protein folding                          |
| 19. | P36578 | RPL4     | 60S ribosomal protein L4                              | 0.40 | 47.697  | Cytosol<br>ER              | RNA binding                               | Translation                              |
| 20. | P35579 | MYH9     | Myosin-9                                              | 0.43 | 226.532 | Cytoskeleton<br>cytosol    | RNA binding                               | actin cytoskeleton reorganization        |
| 21. | Q15084 | PDIA6    | Protein disulfide-isomerase A6                        | 0.45 | 48.121  | ER<br>PM                   | peptide disulfide oxidoreductase activity | Protein folding                          |
| 22. | P00966 | ASS1     | Argininosuccinate synthase                            | 0.46 | 46.530  | Cytosol<br>ER              | RNA binding                               | arginine biosynthetic process            |
| 23. | P31327 | CPS1     | Carbamoyl-phosphate synthase [ammonia], mitochondrial | 0.49 | 164.939 | Mitochondria<br>Nucleus    | ATP binding                               | carbamoyl phosphate biosynthetic process |
| 24. | O43852 | CALU     | Calumenin                                             | 0.50 | 37.107  | ER<br>Golgi apparatus      | calcium ion binding                       | cellular protein metabolic process       |



|     |        |       |                                                    |      |         |                                 |                               |                                                      |
|-----|--------|-------|----------------------------------------------------|------|---------|---------------------------------|-------------------------------|------------------------------------------------------|
| 25. | P10606 | COX5B | Cytochrome c oxidase subunit 5B, mitochondrial     | 0.50 | 13.696  | Mitochondria                    | cytochrome-c oxidase activity | mitochondrial ATP synthesis coupled proton transport |
| 26. | P05556 | ITGB1 | Integrin beta-1                                    | 0.50 | 88.415  | Endosome<br>PM                  | Actin binding                 | B cell differentiation                               |
| 27. | P20700 | LMNB1 | Lamin-B1                                           | 0.50 | 66.408  | Nucleus<br>Cytoskeleton         | structural molecule activity  | interleukin-12-mediated signaling pathway            |
| 28. | P32322 | PYCR1 | Pyrroline-5-carboxylate reductase 1, mitochondrial | 0.50 | 33.361  | Mitochondria                    | identical protein binding     | L-proline biosynthetic process                       |
| 29. | O75340 | PDCD6 | Programmed cell death protein 6                    | 0.50 | 21.868  | Nucleus<br>endosome             | Calcium ion binding           | COPII vesicle coating                                |
| 30. | Q15149 | PLEC  | Plectin                                            | 0.50 | 531.791 | Cytoskeleton<br>Cytosol         | RNA binding                   | hemidesmosome assembly                               |
| 31. | P39023 | RPL3  | 60S ribosomal protein L3                           | 0.50 | 46.109  | Nucleus<br>Cytosol              | RNA binding                   | Translation                                          |
| 32. | P62851 | RPS25 | 40S ribosomal protein S25                          | 0.50 | 13.742  | Cytosol<br>Extracellular region | RNA binding                   | Translation                                          |
| 33. | P61247 | RPS3A | 40S ribosomal protein S3a                          | 0.50 | 29.945  | Nucleus<br>ER                   | RNA binding                   | Translation                                          |
| 34. | P08670 | VIM   | Vimentin                                           | 0.53 | 53.652  | Cytoskeleton<br>Nucleus         | double-stranded RNA binding   | positive regulation of translation                   |
| 35. | P61006 | RAB8A | Ras-related protein Rab-8A                         | 0.56 | 23.668  | Cytoskeleton<br>Endosome        | GTP binding                   | Rab protein signal transduction                      |
| 36. | P18124 | RPL7  | 60S ribosomal protein L7                           | 0.56 | 29.226  | Cytosol<br>nucleus              | DNA binding RNA binding       | Translation                                          |
| 37. | P62280 | RPS11 | 40S ribosomal protein S11                          | 0.57 | 18.431  | Cytosol                         | RNA binding                   | Translation                                          |

|     |        |          |                                                  |      |        |                            |                                          |                                   |
|-----|--------|----------|--------------------------------------------------|------|--------|----------------------------|------------------------------------------|-----------------------------------|
|     |        |          |                                                  |      |        | Extracellular region       |                                          |                                   |
| 38. | P11142 | HSPA8    | Heat shock cognate 71 kDa protein                | 0.58 | 70.898 | Plasma membrane<br>Nucleus | ATP binding                              | ATP metabolic process             |
| 39. | P15311 | EZR      | Ezrin                                            | 0.60 | 69.413 | Cytoskeleton<br>PM         | ATPase binding                           | actin cytoskeleton reorganization |
| 40. | Q99714 | HSD17B10 | 3-hydroxyacyl-CoA dehydrogenase type-2           | 0.60 | 26.923 | Mitochondria<br>PM         | 3-hydroxyacyl-CoA dehydrogenase activity | lipid metabolic process           |
| 41. | P55209 | NAP1L1   | Nucleosome assembly protein 1-like 1             | 0.60 | 45.374 | Nucleus<br>Cytoplasm       | RNA binding                              | DNA replication                   |
| 42. | P08238 | HSP90AB1 | Heat shock protein HSP 90-beta                   | 0.62 | 83.264 | PM<br>Extracellular region | ATP binding                              | Protein folding                   |
| 43. | P80723 | BASP1    | Brain acid soluble protein 1                     | 0.63 | 22.693 | PM<br>Extracellular region | protein domain specific binding          | diaphragm development             |
| 44. | P02545 | LMNA     | Prelamin-A/C                                     | 0.63 | 74.139 | Nucleus<br>cytoskeleton    | identical protein binding                | cellular protein localization     |
| 45. | P07237 | P4HB     | Protein disulfide-isomerase                      | 0.63 | 57.116 | PM<br>ER                   | RNA binding                              | Protein folding                   |
| 46. | P09923 | ALPI     | Intestinal-type alkaline phosphatase             | 0.63 | 56.812 | PM<br>Extracellular region | alkaline phosphatase activity            | dephosphorylation                 |
| 47. | P05186 | ALPL     | Alkaline phosphatase, tissue-nonspecific isozyme | 0.63 | 57.305 | PM<br>Extracellular region | alkaline phosphatase activity            | skeletal system development       |
| 48. | P38646 | HSPA9    | Stress-70 protein, mitochondrial                 | 0.65 | 73.680 | Mitochondria<br>Nucleus    | ATP binding                              | cellular response to heat         |

|     |        |        |                                                                          |      |        |                                             |                                      |                                        |
|-----|--------|--------|--------------------------------------------------------------------------|------|--------|---------------------------------------------|--------------------------------------|----------------------------------------|
| 49. | P14618 | PKM    | Pyruvate kinase PKM                                                      | 0.65 | 57.937 | Mitochondrion<br>nucleus                    | ATP binding                          | ATP biosynthetic process               |
| 50. | P0DMV8 | HSPA1A | Heat shock 70 kDa protein 1A                                             | 0.65 | 70.052 | Cytoskeleton<br>Nucleus                     | ATP binding                          | ATP metabolic process                  |
| 51. | P40926 | MDH2   | Malate dehydrogenase, mitochondrial                                      | 0.65 | 35.503 | Mitochondria<br>Extracellular region        | L-malate dehydrogenase activity      | aerobic respiration                    |
| 52. | P07355 | ANXA2  | Annexin A2                                                               | 0.65 | 38.604 | Extracellular region or secreted<br>Cytosol | RNA binding                          | Angiogenesis                           |
| 53. | P49411 | TUFM   | Elongation factor Tu, mitochondrial                                      | 0.67 | 49.542 | Mitochondria<br>Extracellular region        | GTP binding                          | mitochondrial translational elongation |
| 54. | P35268 | RPL22  | 60S ribosomal protein L22                                                | 0.67 | 14.787 | Cytosol<br>Extracellular region             | RNA binding                          | Translation                            |
| 55. | P04843 | RPN1   | Dolichyl-diphosphooligosaccharide--protein glycosyltransferase subunit 1 | 0.67 | 68.569 | ER<br>Cytosol                               | RNA binding                          | cellular protein modification process  |
| 56. | P45880 | VDAC2  | Voltage-dependent anion-selective channel protein 2                      | 0.67 | 31.567 | Mitochondria                                | voltage-gated anion channel activity | anion transport                        |

**Table S1. Mild type proteins (CY).**

| Sr.<br>no | Code   | Gene<br>Name | Protein<br>Name                                     | Ratio | Mol.mass | Location                        | Molecular<br>Function     | Bio.<br>Function                                                      |
|-----------|--------|--------------|-----------------------------------------------------|-------|----------|---------------------------------|---------------------------|-----------------------------------------------------------------------|
| 1.        | P08133 | ANAX6        | Annexin A6                                          | 1.75  | 75.873   | Cytoplasm<br>Endosome           | GTP binding               | apoptotic signaling pathway                                           |
| 2.        | P00533 | EGFR         | Epidermal growth factor receptor                    | 2.33  | 134.277  | E.R<br>PM                       | ATP binding               | activation of phospholipase A2 activity by calcium-mediated signaling |
| 3.        | P16403 | HIST1H1C     | Histone H1.2                                        | 1.71  | 21.365   | Nucleus<br>Chromosome           | RNA binding               | chromosome condensation                                               |
| 4.        | P60842 | EIF4A1       | Eukaryotic initiation factor 4A-I                   | 2.50  | 46.154   | Cytosol<br>Extracellular region | RNA binding               | cytoplasmic translational initiation                                  |
| 5.        | P13667 | PDIA4        | Protein disulfide-isomerase A4                      | 2.00  | 72.932   | ER<br>Extracellular region      | RNA binding               | Protein folding                                                       |
| 6.        | P00558 | PGK1         | Phosphoglycerate kinase 1                           | 3.00  | 44.615   | Cytoplasm<br>Cytosol            | ADP binding               | cellular response to hypoxia                                          |
| 7.        | P62249 | RPS16        | 40S ribosomal protein S16                           | 1.67  | 16.445   | Cytosol<br>Extracellular region | RNA binding               | translation                                                           |
| 8.        | Q07955 | SRSF1        | Serine/arginine-rich splicing factor 1              | 2.50  | 27.745   | Nucleus<br>Cytoplasm            | DNA topoisomerase binding | alternative mRNA splicing, via spliceosome                            |
| 9.        | P27105 | STOM         | Erythrocyte band 7 integral membrane protein        | 2.00  | 31.731   | Cytoskeleton<br>PM              | RNA polymerase binding    | protein homooligomerization                                           |
| 10.       | Q09666 | AHNAK        | Neuroblast differentiation-associated protein AHNAK | 0.37  | 629.101  | Nucleus<br>Cytoskeleton         | RNA binding               | protein complex oligomerization                                       |

|     |        |           |                                             |      |         |                                      |                                 |                                                     |
|-----|--------|-----------|---------------------------------------------|------|---------|--------------------------------------|---------------------------------|-----------------------------------------------------|
| 11. | P80723 | BASP1     | Brain acid soluble protein 1                | 0.63 | 22.693  | PM<br>Cytoskeleton                   | protein domain specific binding | negative regulation of transcription, DNA-templated |
| 12. | O43852 | CALU      | Calumenin                                   | 0.50 | 37.107  | ER<br>Golgi apparatus                | calcium ion binding             | cellular protein metabolic process                  |
| 13. | P61604 | HSPE1     | 10 kDa heat shock protein, mitochondria     | 0.64 | 10.932  | Mitochondria<br>Extracellular region | ATP binding                     | Protein folding                                     |
| 14. | P58107 | EPPK1     | Epiplakin                                   | 0.50 | 555.658 | Cytoskeleton<br>PM                   | RNA binding                     | intermediate filament bundle assembly               |
| 15. | P38646 | HSPA9     | Stress-70 protein, mitochondrial            | 0.65 | 73.680  | Nucleus<br>Mitochondria              | ATP binding                     | Protein folding                                     |
| 16. | P16401 | HIST1H1B  | Histone H1.5                                | 0.64 | 22.580  | Nucleus                              | RNA binding                     | chromatin organization                              |
| 17. | P33778 | HIST1H2BB | Histone H2B type 1-B                        | 0.51 | 13.950  | Nucleus<br>Cytosol                   | DNA binding                     | nucleosome assembly                                 |
| 18. | P62807 | HIST1H2BC | Histone H2B type 1-C/E/F/G/I                | 0.53 | 13.906  | Nucleus<br>Cytosol                   | DNA binding                     | antibacterial humoral response                      |
| 19. | Q99714 | HSD17B10  | 3-hydroxyacyl-CoA dehydrogenase type-2      | 0.60 | 26.923  | Mitochondria<br>PM                   | RNA binding                     | mitochondrial tRNA 3'-end processing                |
| 20. | P11279 | LAMP1     | Lysosome-associated membrane glycoprotein 1 | 0.40 | 44.882  | Cytosol<br>Endosome                  | enzyme binding                  | Golgi to lysosome transport                         |
| 21. | P55209 | NAP1L1    | Nucleosome assembly                         | 0.40 | 45.374  | Nucleus<br>cytoplasm                 | RNA binding                     | DNA binding                                         |

|     |        |       |                                                         |      |        |                            |                                           |                                 |
|-----|--------|-------|---------------------------------------------------------|------|--------|----------------------------|-------------------------------------------|---------------------------------|
|     |        |       | protein 1-like 1                                        |      |        |                            |                                           |                                 |
| 22. | O75340 | PDCD6 | Programmed cell death protein 6                         | 0.38 | 21.868 | ER<br>Nucleus              | calcium ion binding                       | COPII vesicle coating           |
| 23. | Q15084 | PDIA6 | Protein disulfide-isomerase A6                          | 0.55 | 48.121 | ER<br>PM                   | peptide disulfide oxidoreductase activity | Protein folding                 |
| 24. | Q99623 | PHB2  | Prohibitin-2                                            | 0.62 | 33.296 | Nucleus<br>Mitochondria    | amide binding                             | mitochondrion organization      |
| 25. | P09923 | ALP1  | Intestinal-type alkaline phosphatase                    | 0.63 | 56.812 | PM<br>Extracellular region | alkaline phosphatase activity             | dephosphorylation               |
| 26. | P30048 | PRDX3 | Thioredoxin-dependent peroxide reductase, mitochondrial | 0.50 | 27.693 | Endosome<br>Mitochondria   | alkyl hydroperoxide reductase activity    | cell redox homeostasis          |
| 27. | P07737 | PFN1  | Profilin-1                                              | 0.56 | 15.054 | Cytoskeleton<br>cytosol    | RNA binding                               | protein stabilization           |
| 28. | P61026 | RAB10 | Ras-related protein Rab-10                              | 0.58 | 22.541 | Cytoskeleton<br>ER         | GDP binding                               | Rab protein signal transduction |
| 29. | P51149 | RAB7A | Ras-related protein Rab-7a                              | 0.60 | 23.490 | Endosome<br>Cytosol        | GDP binding                               | Rab protein signal transduction |
| 30. | P26373 | RPL13 | 60S ribosomal protein L13                               | 0.63 | 24.261 | Cytosol<br>ER              | RNA binding                               | Translation                     |
| 31. | P46778 | RPL21 | 60S ribosomal protein L21                               | 0.60 | 18.565 | ER<br>Cytosol              | RNA binding                               | Translation                     |
| 32. | P83731 | RPL24 | 60S ribosomal protein L24                               | 0.67 | 17.779 | Cytosol<br>ER              | RNA binding                               | Translation                     |

|     |        |        |                                             |      |        |                                 |                    |                               |
|-----|--------|--------|---------------------------------------------|------|--------|---------------------------------|--------------------|-------------------------------|
| 33. | P36578 | RPL4   | 60S ribosomal protein L4                    | 0.40 | 47.697 | Cytosol<br>ER                   | RNA binding        | Translation                   |
| 34. | P18124 | RPL7   | 60S ribosomal protein L7                    | 0.44 | 29.226 | Cytosol<br>nucleus              | DNA binding        | Translation                   |
| 35. | P62424 | RPL7A  | 60S ribosomal protein L7a                   | 0.50 | 29.996 | Cytosol<br>Nucleus              | RNA binding        | Translation                   |
| 36. | P52815 | MRPL12 | 39S ribosomal protein L12, mitochondrial    | 0.67 | 21.348 | Mitochondria                    | RNA binding        | mitochondrial transcription   |
| 37. | P62280 | RPS11  | 40S ribosomal protein S11                   | 0.57 | 18.431 | Cytosol<br>Extracellular region | RNA binding        | translation                   |
| 38. | P62244 | RPS15A | 40S ribosomal protein S15a                  | 0.67 | 14.840 | Cytosol<br>Extracellular region | RNA binding        | Translation                   |
| 39. | P51571 | SSR4   | Translocon-associated protein subunit delta | 0.50 | 18.999 | ER<br>Extracellular region      | Calcium binding    | -                             |
| 40. | P02786 | TFRC   | Transferrin receptor protein 1              | 0.62 | 84.871 | PM<br>endosome                  | RNA binding        | cellular iron ion homeostasis |
| 41. | Q8NBS9 | TXNDC5 | Thioredoxin domain-containing protein 5     | 0.63 | 47.629 | ER<br>Extracellular region      | isomerase activity | apoptotic cell clearance      |

**Table S4. Wild Type Proteins (WY).**

| Sr. no | Code   | Gene name | Protein name                                   | Ratio | Mol. mass kDa | Location                   | Mol. function                             | Bio. Function                                        |
|--------|--------|-----------|------------------------------------------------|-------|---------------|----------------------------|-------------------------------------------|------------------------------------------------------|
| 1.     | O95573 | ACSL3     | Long-chain-fatty-acid--CoA ligase 3            | 2.00  | 80.420        | Mitochondria<br>ER         | long-chain fatty acid-CoA ligase activity | long-chain fatty acid import into cell               |
| 2.     | P00966 | ASS1      | Argininosuccinate synthase                     | 2.50  | 46.530        | Cytosol<br>ER              | ATP binding                               | arginine biosynthetic process                        |
| 3.     | Q07065 | CKAP4     | Cytoskeleton-associated protein 4              | 2.67  | 66.022        | Cytoskeleton<br>PM         | RNA binding                               | post-translational protein modification              |
| 4.     | P10606 | COX5B     | Cytochrome c oxidase subunit 5B, mitochondrial | 2.00  | 13.696        | Mitochondria               | cytochrome-c oxidase activity             | mitochondrial ATP synthesis coupled proton transport |
| 5.     | Q14697 | GANAB     | Neutral alpha-glucosidase AB                   | 2.00  | 106.874       | ER<br>Extracellular region | RNA binding                               | N-glycan processing                                  |
| 6.     | P16403 | HIST1H1C  | Histone H1.2                                   | 2.40  | 21.365        | Nucleus<br>Chromosome      | RNA binding                               | chromosome condensation                              |
| 7.     | P16401 | HIST1H1B  | Histone H1.5                                   | 1.75  | 22.580        | Nucleus<br>Chromosome      | RNA binding                               | chromatin organization                               |
| 8.     | P04792 | HSPB1     | Heat shock protein beta-1                      | 1.86  | 22.783        | Cytoskeleton<br>Nucleus    | RNA binding                               | anterograde axonal protein transport                 |
| 9.     | P02545 | LMNA      | Prelamin-A/C                                   | 1.80  | 74.139        | Nucleus<br>Cytoskeleton    | identical protein binding                 | cellular protein localization                        |
| 10.    | Q96AG4 | LRRC59    | Leucine-rich repeat-                           | 2.33  | 34.930        | Nucleus                    | RNA binding                               | -                                                    |



|     |        |        |                                                                          |      |         |                            |                                 |                                       |
|-----|--------|--------|--------------------------------------------------------------------------|------|---------|----------------------------|---------------------------------|---------------------------------------|
|     |        |        | containing protein 59                                                    |      |         | ER                         |                                 |                                       |
| 11. | P35579 | MYH9   | Myosin-9                                                                 | 2.00 | 226.532 | Cytoskeleton<br>Cytosol    | ADP binding                     | actin cytoskeleton reorganization     |
| 12. | P30101 | PDIA3  | Protein disulfide-isomerase A3                                           | 2.67 | 56.782  | ER<br>Endosome             | RNA binding                     | Protein folding                       |
| 13. | P13667 | PDIA4  | Protein disulfide-isomerase A4                                           | 2.67 | 72.932  | ER<br>Extracellular region | RNA binding                     | Protein folding                       |
| 14. | Q15149 | PLEC   | Plectin                                                                  | 1.75 | 531.791 | Cytoskeleton<br>Cytosol    | RNA binding                     | hemidesmosome assembly                |
| 15. | P23284 | PPIB   | Peptidyl-prolyl cis-trans isomerase B                                    | 2.40 | 23.743  | ER<br>Extracellular region | RNA binding                     | bone development                      |
| 16. | Q13162 | PRDX4  | Peroxioredoxin-4                                                         | 2.50 | 30.540  | ER<br>cytosol              | thioredoxin peroxidase activity | cell redox homeostasis                |
| 17. | P62424 | RPL7A  | 60S ribosomal protein L7a                                                | 1.75 | 29.996  | Cytosol<br>nucleus         | RNA binding                     | translation                           |
| 18. | P04844 | RPN2   | Dolichyl-diphosphooligosaccharide--protein glycosyltransferase subunit 2 | 2.00 | 69.284  | ER                         | Ribosome binding                | cellular protein modification process |
| 19. | P61247 | RPS3A  | 40S ribosomal protein S3a                                                | 2.33 | 29.945  | Nucleus<br>cytosol         | RNA binding                     | translation                           |
| 20. | Q8NBS9 | TXNDC5 | Thioredoxin domain-containing protein 5                                  | 1.67 | 47.692  | ER<br>Extracellular region | isomerase activity              | apoptotic cell clearance              |
| 21. | P08670 | VIM    | Vimentin                                                                 | 1.95 | 53.652  | Cytoskeleton<br>Nucleus    | double-stranded RNA binding     | positive regulation of translation    |

|     |        |            |                                                          |      |         |                            |                                          |                                                                                                                   |
|-----|--------|------------|----------------------------------------------------------|------|---------|----------------------------|------------------------------------------|-------------------------------------------------------------------------------------------------------------------|
| 22. | P01891 | HLA-A      | HLA class I histocompatibility antigen, A-68 alpha chain | 0.56 | 40.909  | ER<br>endosome             | RNA binding                              | antigen processing and presentation of endogenous peptide antigen via MHC class I via ER pathway, TAP-independent |
| 23. | P68032 | ACTC1      | Actin, alpha cardiac muscle 1                            | 0.61 | 42.019  | Cytoskeleton<br>Cytosol    | ATP binding                              | actin filament organization                                                                                       |
| 24. | P48047 | ATP5PO     | ATP synthase subunit O, mitochondrial                    | 0.67 | 23.277  | Mitochondria<br>Nucleus    | ATPase binding                           | ATP5PO                                                                                                            |
| 25. | P27824 | CANX       | Calnexin                                                 | 0.53 | 67.568  | ER<br>Extracellular region | RNA binding                              | Protein folding                                                                                                   |
| 26. | P13987 | CD59       | CD59 glycoprotein                                        | 0.67 | 14.177  | PM<br>Extracellular region | complement binding                       | cell surface receptor signaling pathway                                                                           |
| 27. | P40939 | HADHA      | Trifunctional enzyme subunit alpha, mitochondrial        | 0.67 | 83.000  | Mitochondria               | 3-hydroxyacyl-CoA dehydrogenase activity | fatty acid beta-oxidation                                                                                         |
| 28. | P58107 | EPPK1      | Epiplakin                                                | 0.40 | 555.658 | Cytoskeleton<br>PM         | RNA binding                              | intermediate filament bundle assembly                                                                             |
| 29. | P84090 | ERH        | Enhancer of rudimentary homolog                          | 0.50 | 12.259  | Methylosome                | RNA binding                              | Cell cycle                                                                                                        |
| 30. | P20671 | HIST1H2AD  | Histone H2A type 1-D                                     | 0.63 | 14.107  | Nucleus<br>ER              | DNA binding                              | chromatin organization                                                                                            |
| 31. | Q6FI13 | HIST2H2AA3 | Histone H2A type 2-A                                     | 0.63 | 14.095  | Nucleus<br>ER              | DNA binding                              | chromatin organization                                                                                            |
| 32. | O75367 | H2AFY      | Core histone macro-H2A.1                                 | 0.60 | 39.617  | Nucleus<br>ER              | DNA binding                              | chromatin organization                                                                                            |

|     |        |           |                                           |      |         |                                 |                                  |                        |
|-----|--------|-----------|-------------------------------------------|------|---------|---------------------------------|----------------------------------|------------------------|
| 33. | P33778 | HIST1H2BB | Histone H2B type 1-B                      | 0.48 | 13.950  | Nucleus<br>cytosol              | DNA binding                      | nucleosome assembly    |
| 34. | P62807 | HIST1H2BC | Histone H2B type 1-C/E/F/G/I              | 0.54 | 13.906  | Nucleus<br>cytosol              | DNA binding                      | nucleosome assembly    |
| 35. | P69905 | HBA1      | Hemoglobin subunit alpha                  | 0.53 | 15.258  | Cytosol<br>Extracellular region | heme binding                     | Oxygen transport       |
| 36. | P46940 | IQGAP1    | Ras GTPase-activating-like protein IQGAP1 | 0.67 | 189.252 | Nucleus<br>Cytoskeleton         | GTPase activator activity        | Signal transduction    |
| 37. | P55209 | NAP1L1    | Nucleosome assembly protein 1-like 1      | 0.67 | 45.374  | Nucleus<br>Cytoplasm            | RNA binding                      | DNA replication        |
| 38. | Q15366 | PCBP2     | Poly(rC)-binding protein 2                | 0.67 | 38.580  | Nucleus<br>Extracellular region | RNA binding                      | mRNA metabolic process |
| 39. | Q99623 | PHB2      | Prohibitin-2                              | 0.67 | 33.296  | Nucleus<br>Mitochondria         | Amide binding                    | Protein stabilization  |
| 40. | P32119 | PRDX2     | Peroxiredoxin-2                           | 0.67 | 21.892  | Cytosol<br>Extracellular region | antioxidant activity             | cell redox homeostasis |
| 41. | P07737 | PFN1      | Profilin-1                                | 0.50 | 15.045  | Cytoskeleton<br>Cytosol         | RNA binding                      | protein stabilization  |
| 42. | P20742 | PZP       | Pregnancy zone protein                    | 0.57 | 163.863 | Extracellular region            | endopeptidase inhibitor activity | female pregnancy       |
| 43. | P26373 | RPL13     | 60S ribosomal protein L13                 | 0.63 | 24.261  | Cytosol<br>ER                   | RNA binding                      | translation            |
| 44. | P83731 | RPL24     | 60S ribosomal protein L24                 | 0.57 | 17.779  | Cytosol<br>ER                   | RNA binding                      | Translation            |
| 45. | Q13501 | SQSTM1    | Sequestosome-1                            | 0.50 | 47.687  | Cytosol<br>Nucleus              | SH2 domain binding               | aggrephagy             |

**Table S5.** Common proteins in CW-CY.

| Sr. No | Code   | Gene name | Protein name                           | Ratio | Mol. masses kDa | Location     | Molecular Function                        | Biological function                        |
|--------|--------|-----------|----------------------------------------|-------|-----------------|--------------|-------------------------------------------|--------------------------------------------|
| 1.     | P60842 | EIF4A1    | Eukaryotic initiation factor 4A-I      | 2.50  | 46.154          | cytosol      | RNA binding                               | cytoplasmic translational initiation       |
| 2.     | Q07955 | SRSF1     | Serine/arginine-rich splicing factor 1 | 3.50  | 27.745          | nucleus      | RNA binding                               | alternative mRNA splicing, via spliceosome |
| 3.     | P36578 | RPL4      | 60S ribosomal protein L4               | 0.40  | 47.697          | Cytosol      | RNA binding                               | translation                                |
| 4.     | Q15084 | PDIA6     | Protein disulfide-isomerase A6         | 0.45  | 48.121          | ER           | peptide disulfide oxidoreductase activity | Protein folding                            |
| 5.     | O43852 | CALU      | Calumenin                              | 0.50  | 37.107          | ER           | calcium ion binding                       | cellular protein metabolic process         |
| 6.     | O75340 | PDCD6     | Programmed cell death protein 6        | 0.50  | 21.868          | endosome     | Calcium ion binding                       | COPII vesicle coating                      |
| 7.     | P18124 | RPL7      | 60S ribosomal protein L7               | 0.56  | 29.226          | cytosol      | DNA binding RNA binding                   | Translation                                |
| 8.     | P62280 | RPS11     | 40S ribosomal protein S11              | 0.57  | 18.431          | cytosol      | RNA binding                               | Translation                                |
| 9.     | Q99714 | HSD17B10  | 3-hydroxyacyl-CoA dehydrogenase type-2 | 0.60  | 26.923          | mitochondria | 3-hydroxyacyl-CoA dehydrogenase activity  | lipid metabolic process                    |
| 10.    | P80723 | BASP1     | Brain acid soluble protein 1           | 0.63  | 22.693          | PM           | protein domain specific binding           | diaphragm development                      |
| 11.    | P09923 | ALPI      | Intestinal-type alkaline phosphatase   | 0.63  | 56.812          | PM           | alkaline phosphatase activity             | Dephosphorylation                          |
| 12.    | P38646 | HSPA9     | Stress-70 protein, mitochondrial       | 0.65  | 73.680          | nucleus      | ATP binding                               | cellular response to heat                  |

**Table S6.** Common proteins in CW-WY.

| <b>Sr.<br/>No</b> | <b>Code</b> | <b>Gene<br/>Name</b> | <b>Protein<br/>Name</b>        | <b>Ratio</b> | <b>Mol.mass</b> | <b>Location</b> | <b>Mol.<br/>function</b> | <b>Bio.<br/>Function</b>              |
|-------------------|-------------|----------------------|--------------------------------|--------------|-----------------|-----------------|--------------------------|---------------------------------------|
| 1.                | P16403      | HIST1H1C             | Histone H1.2                   | 1.71         | 21.365          | nucleus         | RNA binding              | chromosome condensation               |
| 2.                | P13667      | PDIA4                | Protein disulfide-isomerase A4 | 2.00         | 72.932          | ER              | RNA binding              | Protein folding                       |
| 3.                | P58107      | EPPK1                | Epiplakin                      | 0.50         | 555.658         | cytoskeleton    | RNA binding              | intermediate filament bundle assembly |
| 4.                | P33778      | HIST1H2BB            | Histone H2B type 1-B           | 0.51         | 13.950          | nucleus         | DNA binding              | nucleosome assembly                   |
| 5.                | P62807      | HIST1H2BC            | Histone H2B type 1-C/E/F/G/I   | 0.53         | 13.906          | nucleus         | DNA binding              | antibacterial humoral response        |
| 6.                | Q99623      | PHB2                 | Prohibitin-2                   | 0.62         | 33.296          | nucleus         | amide binding            | mitochondrion organization            |
| 7.                | P07737      | PFN1                 | Profilin-1                     | 0.56         | 15.054          | Cytoskeleton    | RNA binding              | protein stabilization                 |
| 8.                | P26373      | RPL13                | 60S ribosomal protein L13      | 0.63         | 24.261          | cytosol         | RNA binding              | Translation                           |
| 9.                | P83731      | RPL24                | 60S ribosomal protein L24      | 0.67         | 17.779          | Cytosol         | RNA binding              | Translation                           |

**Table S7.** Common proteins in CY – WY.

| Sr. No | Code   | Gene name | Protein name                                   | Ratio | Mol. masses kDa | Location     | Molecular Function              | Biological function                                  |
|--------|--------|-----------|------------------------------------------------|-------|-----------------|--------------|---------------------------------|------------------------------------------------------|
| 1.     | P01891 | HLA-A     | 1A68                                           | 1.80  | 40.909          | ER           | RNA binding                     | regulation of immune response                        |
| 2.     | P32119 | PRDX2     | Peroxi-redoxi-n-2                              | 2.00  | 21.892          | cytoplasm    | antioxidant activity            | cell redox homeostasis                               |
| 3.     | P69905 | HBA1      | Hemoglobin subunit alpha                       | 2.11  | 15.258          | cytosol      | Heme binding                    | Oxygen transport                                     |
| 4.     | Q13162 | PRDX4     | Peroxi-redoxi-n-4                              | 0.29  | 30.540          | ER           | thioredoxin peroxidase activity | cell redox homeostasis                               |
| 5.     | P23284 | PPIB      | Peptidyl-prolyl cis-trans isomerase B          | 0.29  | 23.743          | ER           | RNA binding                     | Bone development                                     |
| 6.     | Q07065 | CKAP4     | Cytoskeleton-associated protein 4              | 0.30  | 66.022          | cytoskeleton | RNA binding                     | Post translation protein modification                |
| 7.     | Q96AG4 | LRRC59    | Leucine-rich repeat-containing protein 59      | 0.33  | 34.930          | nucleus      | RNA binding                     | -                                                    |
| 8.     | P04792 | HSPB1     | Heat shock protein beta-1                      | 0.39  | 22.783          | cytoskeleton | RNA binding                     | anterograde axonal protein transport                 |
| 9.     | Q14697 | GANAB     | Neutral alpha-glucosidase AB                   | 0.40  | 106.874         | ER           | RNA binding                     | N-glycan processing                                  |
| 10.    | P30101 | PDIA3     | Protein disulfide-isomerase A3                 | 0.40  | 56.782          | ER           | RNA binding                     | Protein folding                                      |
| 11.    | P35579 | MYH9      | Myosin-9                                       | 0.43  | 226.532         | cytoskeleton | RNA binding                     | actin cytoskeleton reorganization                    |
| 12.    | P00966 | ASS1      | Argininosuccinate synthase                     | 0.46  | 46.530          | cytosol      | RNA binding                     | arginine biosynthetic process                        |
| 13.    | P10606 | COX5B     | Cytochrome c oxidase subunit 5B, mitochondrial | 0.50  | 13.696          | Mitochondria | cytochrome-c oxidase activity   | mitochondrial ATP synthesis coupled proton transport |

|     |        |       |                           |      |         |              |                             |                                    |
|-----|--------|-------|---------------------------|------|---------|--------------|-----------------------------|------------------------------------|
| 14. | Q15149 | PLEC  | Plectin                   | 0.50 | 531.791 | cytoskeleton | RNA binding                 | hemidesmosome assembly             |
| 15. | P61247 | RPS3A | 40S ribosomal protein S3a | 0.50 | 29.945  | nucleus      | RNA binding                 | Translation                        |
| 16. | P08670 | VIM   | Vimentin                  | 0.53 | 53.652  | cytoskeleton | double-stranded RNA binding | positive regulation of translation |
| 17. | P02545 | LMNA  | Prelamin-A/C              | 0.63 | 74.139  | Nucleus      | identical protein binding   | cellular protein localization      |

**Table S8.** Common proteins in CWY.

| Sr. No | Code   | Gene name | Protein name                            | Ratio | Mol. masses kDa | Location | Molecular Function | Biological function      |
|--------|--------|-----------|-----------------------------------------|-------|-----------------|----------|--------------------|--------------------------|
| 1.     | P62424 | RPL7A     | 60S ribosomal protein L7a               | 0.29  | 29.996          | cytosol  | RNA binding        | translation              |
| 2.     | P16401 | HIST1H1B  | Histone H1.5                            | 0.36  | 22.580          | nucleus  | RNA binding        | Chromatin organization   |
| 3.     | Q8NBS9 | TXNDC5    | Thioredoxin domain-containing protein 5 | 0.38  | 47.629          | ER       | isomerase activity | apoptotic cell clearance |
| 4.     | P55209 | NAP1L1    | Nucleosome assembly protein 1-like 1    | 0.60  | 45.374          | nucleus  | RNA binding        | DNA replication          |

**Table S9.** Unique Proteins in CW.

| Sr. No | Code   | Gene name | Protein name                                          | Ratio | Mol. masses kDa | Location             | Molecular Function                      | Biological function                                        |
|--------|--------|-----------|-------------------------------------------------------|-------|-----------------|----------------------|-----------------------------------------|------------------------------------------------------------|
| 1.     | P26447 | S100A4    | S100-A4                                               | 1.71  | 11.729          | Extracellular region | RNA binding                             | positive regulation of I-kappaB kinase/NF-kappaB signaling |
| 2.     | P18669 | PGAM1     | Phosphoglycerate mutase 1                             | 2.00  | 28.804          | cytosol              | phosphoglycerate mutase activity        | glycolytic process                                         |
| 3.     | O43175 | PHGDH     | D-3-phosphoglycerate dehydrogenase                    | 2.00  | 56.651          | cytosol              | phosphoglycerate dehydrogenase activity | Brain development                                          |
| 4.     | P31327 | CPS1      | Carbamoyl-phosphate synthase [ammonia], mitochondrial | 0.49  | 164.939         | mitochondria         | ATP binding                             | carbamoyl phosphate biosynthetic process                   |
| 5.     | P05556 | ITGB1     | Integrin beta-1                                       | 0.50  | 88.415          | endosome             | Actin binding                           | B cell differentiation                                     |
| 6.     | P20700 | LMNB1     | Lamin-B1                                              | 0.50  | 66.408          | nucleus              | structural molecule activity            | interleukin-12-mediated signaling pathway                  |
| 7.     | P32322 | PYCR1     | Pyrroline-5-carboxylate reductase 1, mitochondrial    | 0.50  | 33.361          | mitochondria         | identical protein binding               | L-proline biosynthetic process                             |
| 8.     | P39023 | RPL3      | 60S ribosomal protein L3                              | 0.50  | 46.109          | nucleus              | RNA binding                             | Translation                                                |
| 9.     | P62851 | RPS25     | 40S ribosomal protein S25                             | 0.50  | 13.742          | cytosol              | RNA binding                             | Translation                                                |
| 10.    | P61006 | RAB8A     | Ras-related protein Rab-8A                            | 0.56  | 23.668          | endosome             | GTP binding                             | Rab protein signal transduction                            |
| 11.    | P11142 | HSPA8     | Heat shock cognate 71 kDa protein                     | 0.58  | 70.898          | Plasma membrane      | ATP binding                             | ATP metabolic process                                      |



|     |        |          |                                                                          |      |        |                                  |                                      |                                        |
|-----|--------|----------|--------------------------------------------------------------------------|------|--------|----------------------------------|--------------------------------------|----------------------------------------|
| 12. | P15311 | EZR      | Ezrin                                                                    | 0.60 | 69.413 | cytoskeleton                     | ATPase binding                       | actin cytoskeleton reorganization      |
| 13. | P08238 | HSP90AB1 | Heat shock protein HSP 90-beta                                           | 0.62 | 83.264 | PM                               | ATP binding                          | Protein folding                        |
| 14. | P07237 | P4HB     | Protein disulfide-isomerase                                              | 0.63 | 57.116 | ER                               | RNA binding                          | Protein folding                        |
| 15. | P05186 | ALPL     | Alkaline phosphatase , tissue-nonspecific isozyme                        | 0.63 | 57.305 | PM                               | alkaline phosphatase activity        | skeletal system development            |
| 16. | P14618 | PKM      | Pyruvate kinase PKM                                                      | 0.65 | 57.937 | nucleus                          | ATP binding                          | ATP biosynthetic process               |
| 17. | P0DMV8 | HSPA1A   | Heat shock 70 kDa protein 1A                                             | 0.65 | 70.052 | cytoskeleton                     | ATP binding                          | ATP metabolic process                  |
| 18. | P40926 | MDH2     | Malate dehydrogenase, mitochondrial                                      | 0.65 | 35.503 | mitochondria                     | L-malate dehydrogenase activity      | aerobic respiration                    |
| 19. | P07355 | ANXA2    | Annexin A2                                                               | 0.65 | 38.604 | Extracellular region or secreted | RNA binding                          | Angiogenesis                           |
| 20. | P49411 | TUFM     | Elongation factor Tu, mitochondrial                                      | 0.67 | 49.542 | mitochondria                     | GTP binding                          | mitochondrial translational elongation |
| 21. | P35268 | RPL22    | 60S ribosomal protein L22                                                | 0.67 | 14.787 | cytosol                          | RNA binding                          | Translation                            |
| 22. | P04843 | RPN1     | Dolichyl-diphosphooligosaccharide--protein glycosyltransferase subunit 1 | 0.67 | 68.569 | ER                               | RNA binding                          | cellular protein modification process  |
| 23. | P45880 | VDAC2    | Voltage-dependent anion-selective channel protein 2                      | 0.67 | 31.567 | Mitochondria                     | voltage-gated anion channel activity | anion transport                        |

**Table S2.** Unique proteins in CY.

| Sr.<br>no | Code   | Gene<br>Name | Protein<br>Name                                         | Ratio | Mol.mass | Location     | Mol.<br>Function                       | Bio.<br>Function                |
|-----------|--------|--------------|---------------------------------------------------------|-------|----------|--------------|----------------------------------------|---------------------------------|
| 1.        | P08133 | ANAX6        | Annexin A6                                              | 1.75  | 75.873   | cytoplasm    | GTP binding                            | apoptotic signaling pathway     |
| 2.        | P00558 | PGK1         | Phosphoglycerate kinase 1                               | 3.00  | 44.615   | cytoplasm    | ADP binding                            | cellular response to hypoxia    |
| 3.        | P62249 | RPS16        | 40S ribosomal protein S16                               | 1.67  | 16.445   | cytosol      | RNA binding                            | translation                     |
| 4.        | P27105 | STOM         | Erythrocyte band 7 integral membrane protein            | 2.00  | 31.731   | cytoskeleton | RNA polymerase binding                 | protein homooligomerization     |
| 5.        | Q09666 | AHNAK        | Neuroblast differentiation-associated protein AHNAK     | 0.37  | 629.101  | nucleus      | RNA binding                            | protein complex oligomerization |
| 6.        | P61604 | HSPE1        | 10 kDa heat shock protein, mitochondria                 | 0.64  | 10.932   | Mitochondria | ATP binding                            | Protein folding                 |
| 7.        | P11279 | LAMP1        | Lysosome-associated membrane glycoprotein 1             | 0.40  | 44.882   | endosome     | enzyme binding                         | Golgi to lysosome transport     |
| 8.        | P30048 | PRDX3        | Thioredoxin-dependent peroxide reductase, mitochondrial | 0.50  | 27.693   | endosome     | alkyl hydroperoxide reductase activity | cell redox homeostasis          |
| 9.        | P61026 | RAB10        | Ras-related protein Rab-10                              | 0.58  | 22.541   | Cytoskeleton | GDP binding                            | Rab protein signal transduction |
| 10.       | P51149 | RAB7A        | Ras-related protein Rab-7a                              | 0.60  | 23.490   | endosome     | GDP binding                            | Rab protein signal transduction |

|     |        |        |                                             |      |         |              |                 |                                                                       |
|-----|--------|--------|---------------------------------------------|------|---------|--------------|-----------------|-----------------------------------------------------------------------|
| 11. | P46778 | RPL21  | 60S ribosomal protein L21                   | 0.60 | 18.565  | ER           | RNA binding     | Translation                                                           |
| 12. | P52815 | MRPL12 | 39S ribosomal protein L12, mitochondrial    | 0.67 | 21.348  | Mitochondria | RNA binding     | mitochondrial transcription                                           |
| 13. | P62244 | RPS15A | 40S ribosomal protein S15a                  | 0.67 | 14.840  | cytosol      | RNA binding     | Translation                                                           |
| 14. | P51571 | SSR4   | Translocon-associated protein subunit delta | 0.50 | 18.999  | ER           | Calcium binding | -                                                                     |
| 15. | P02786 | TFRC   | Transferrin receptor protein 1              | 0.62 | 84.871  | PM           | RNA binding     | cellular iron ion homeostasis                                         |
| 16. | P00533 | EGFR   | Epidermal growth factor receptor            | 2.33 | 134.277 | PM<br>ER     | ATP binding     | activation of phospholipase A2 activity by calcium-mediated signaling |

**Table S3.** Unique proteins in WY.

| Sr. No | Code   | Gene name | Protein name                                                             | Ratio | Mol. mass<br>kDa | Location     | Mol. function                             | Bio. Function                          |
|--------|--------|-----------|--------------------------------------------------------------------------|-------|------------------|--------------|-------------------------------------------|----------------------------------------|
| 1.     | O95573 | ACSL3     | Long-chain-fatty-acid--CoA ligase 3                                      | 2.00  | 80.420           | Mitochondria | long-chain fatty acid-CoA ligase activity | long-chain fatty acid import into cell |
| 2.     | P04844 | RPN2      | Dolichyl-diphosphooligosaccharide--protein glycosyltransferase subunit 2 | 2.00  | 69.284           | ER           | Ribosome binding                          | cellular protein modification process  |

|     |        |            |                                                   |      |         |                      |                                          |                                         |
|-----|--------|------------|---------------------------------------------------|------|---------|----------------------|------------------------------------------|-----------------------------------------|
| 3.  | P68032 | ACTC1      | Actin, alpha cardiac muscle 1                     | 0.61 | 42.019  | Cytoskeleton         | ATP binding                              | actin filament organization             |
| 4.  | P48047 | ATP5PO     | ATP synthase subunit O, mitochondrial             | 0.67 | 23.277  | Mitochondria         | ATPase binding                           | ATP5PO                                  |
| 5.  | P27824 | CANX       | Calnexin                                          | 0.53 | 67.568  | ER                   | RNA binding                              | Protein folding                         |
| 6.  | P13987 | CD59       | CD59 glycoprotein                                 | 0.67 | 14.177  | PM                   | complement binding                       | cell surface receptor signaling pathway |
| 7.  | P40939 | HADHA      | Trifunctional enzyme subunit alpha, mitochondrial | 0.67 | 83.000  | Mitochondria         | 3-hydroxyacyl-CoA dehydrogenase activity | fatty acid beta-oxidation               |
| 8.  | P84090 | ERH        | Enhancer of rudimentary homolog                   | 0.50 | 12.259  | methylosome          | RNA binding                              | Cell cycle                              |
| 9.  | P20671 | HIST1H2AD  | Histone H2A type 1-D                              | 0.63 | 14.107  | Nucleus              | DNA binding                              | chromatin organization                  |
| 10. | Q6FI13 | HIST2H2AA3 | Histone H2A type 2-A                              | 0.63 | 14.095  | Nucleus              | DNA binding                              | chromatin organization                  |
| 11. | O75367 | H2AFY      | Core histone macro-H2A.1                          | 0.60 | 39.617  | Nucleus              | DNA binding                              | chromatin organization                  |
| 12. | P46940 | IQGAP1     | Ras GTPase-activating-like protein IQGAP1         | 0.67 | 189.252 | Nucleus              | GTPase activator activity                | Signal transduction                     |
| 13. | Q15366 | PCBP2      | Poly(rC)-binding protein 2                        | 0.67 | 38.580  | Nucleus              | RNA binding                              | mRNA metabolic process                  |
| 14. | P20742 | PZP        | Pregnancy zone protein                            | 0.57 | 163.863 | Extracellular region | endopeptidase inhibitor activity         | female pregnancy                        |
| 15. | Q13501 | SQSTM1     | Sequestosome-1                                    | 0.50 | 47.687  | Cytosol              | SH2 domain binding                       | Aggrephagy                              |
